# Supplementary material for: Microwave-accelerated direct synthesis of 3-picoline from glycerol through a liquid phase reaction pathway
Source: Royal Society of Chemistry journal article supplement (doi:10.1039/c5nj02735g), 2016-01-01
Supplement: c5nj02735g1.pdf [file c5nj02735g1.pdf]

## Support Information

# Microwave-accelerated direct synthesis of 3-picoline from glycerol through a liquid phase reaction pathway

Cai-Wu Luo <sup>a, b</sup> Xiao-Yan Feng <sup>c</sup> and Zi-Sheng Chao <sup>a, \*</sup>

<sup>a</sup> College of Materials Science and Engineering, Changsha University of Science & Technology, Changsha, Hunan 410114, China

<sup>b</sup> School of Environmental Protection and Safety Engineering, University of South China, Hengyang, Hunan 421001, China

<sup>c</sup> College of Chemistry and Chemical Engineering, State Key Laboratory of Chem/Biosensing and Chemometrics, Hunan University, Changsha, Hunan 410082, China

\* Corresponding author: Prof. Zi-Sheng Chao;

Tel: +86-731-88713257;

E-mail address: [chao\\_zs@aliyun.com](mailto:chao_zs@aliyun.com) or [zschao@yahoo.com](mailto:zschao@yahoo.com)

## 1. Characterizations

N<sub>2</sub>-physisorption was conducted on a Quantachrome Autosorb-1 instrument at liquid-N<sub>2</sub> temperature. Before measurement, the specimen was in situ outgassed in the instrument at 300 °C for 12 h under a vacuum of 10<sup>-8</sup> Torr. The Brunauer–Emmett–Teller (BET) method was employed to calculate the specific surface area, with the correlation coefficient being above 0.9999. The total pore volume was calculated at a relative pressure of  $P/P_0 = 0.99$ , assuming full surface coverage with nitrogen. The “t-plot” method was used to estimate the micropore area and volume.

Ammonia temperature-programmed desorption (NH<sub>3</sub>-TPD) profile was recorded by a Micromeritics AutoChem II 2920 analyzer equipped with a TCD detector. The specimen (170 mg) was first heated by a rate of 10 °C·min<sup>-1</sup> from room temperature to 400 °C in a stream of helium (99.99%, 60 mL·min<sup>-1</sup>) and pretreated at that temperature and atmosphere for 0.5 h. Then, the specimen was cooled to 100 °C and subjected to ammonia-saturation in a stream of 5% NH<sub>3</sub>/He with a flow rate of 50 mL·min<sup>-1</sup>. After the sample was purged with helium at 100 °C for 1 h, ammonia was desorbed by heating the specimen to 800 °C at a rate of 10 °C·min<sup>-1</sup>.

**Figure S1**

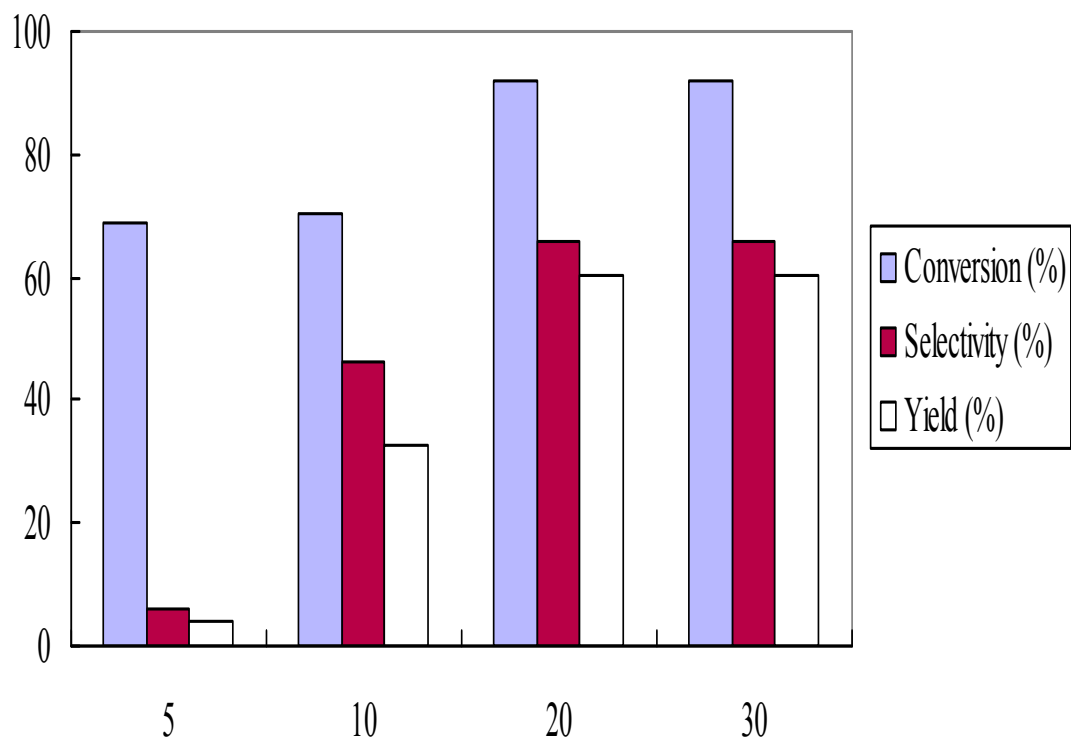

**Fig. S1.** Effect of reaction time (min) on the production of 3-picoline under microwave irradiation. (Reaction conditions: reaction temperature = 373 K, and molar ratio of glycerol / ammonium acetate / HAc = 1 / 3.58 / 15.4).

**Figure S2**

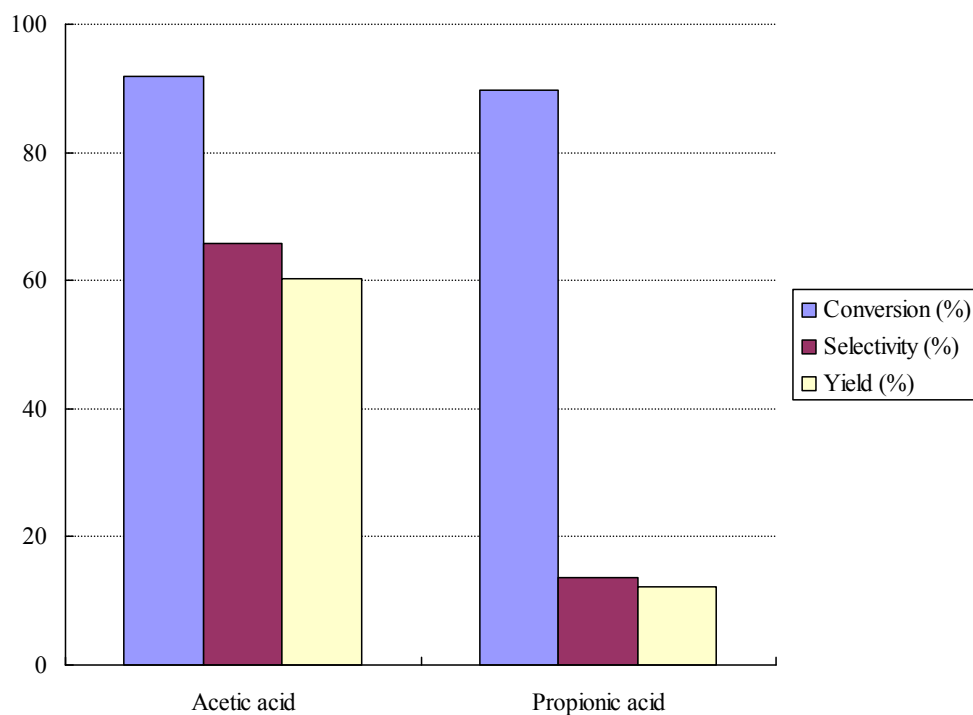

**Fig. S2.** Comparison between the production of 3-picoline using acetic acid and propionic acid as both the solvent and catalyst under microwave irradiation, respectively. (Reaction conditions: reaction temperature = 373 K, reaction time = 20 min, and molar ratio of glycerol / ammonium acetate / (acetic acid or propionic acid) = 1 / 3.58 / 15.4).

**Figure S3**

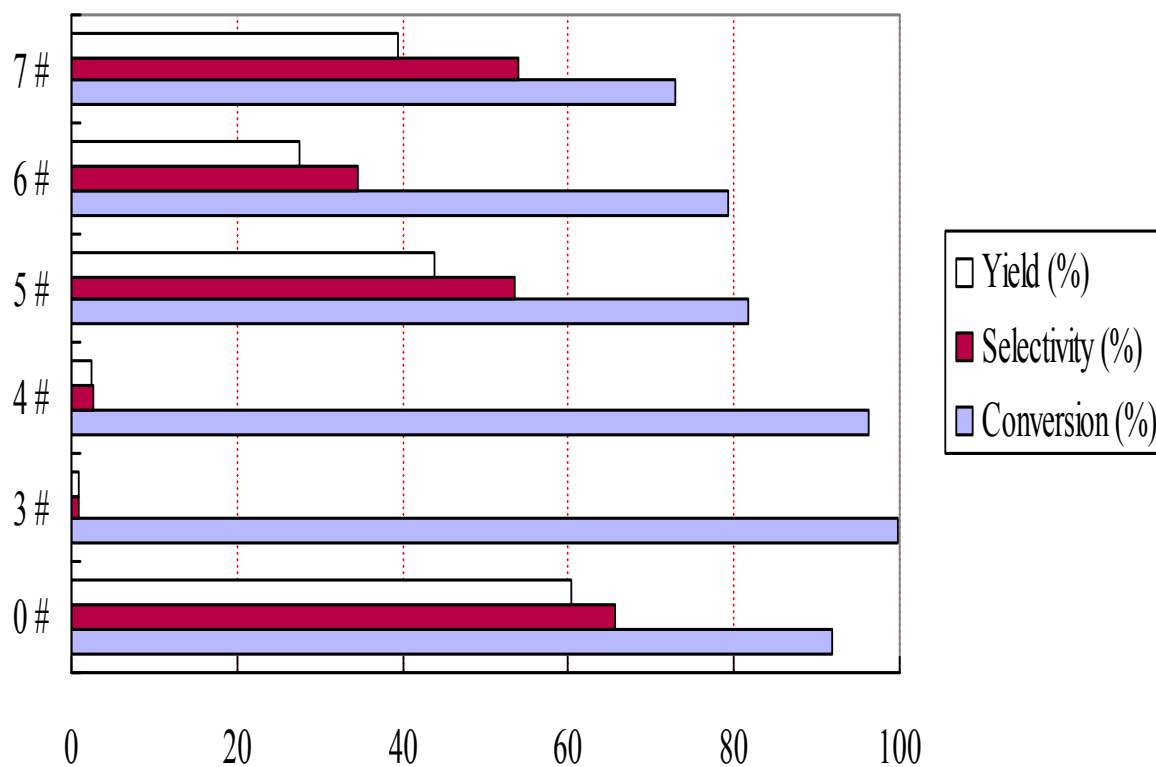

**Fig. S3.** Effect of various organic acid solid catalysts on the production of 3-picoline under microwave irradiation. 0 #: Blank, 3 #: stearic acid, 4 #: oxalic acid, 5 #: adipic acid, 6 #: sulfosalicylic acid, 7 #: edetic acid. (Reaction conditions: reaction temperature = 373 K, reaction time = 20 min, and mass ratio of glycerol/ammonium acetate/acetic acid/solid catalyst = 1/3/10/0.2).

**Figure S4**

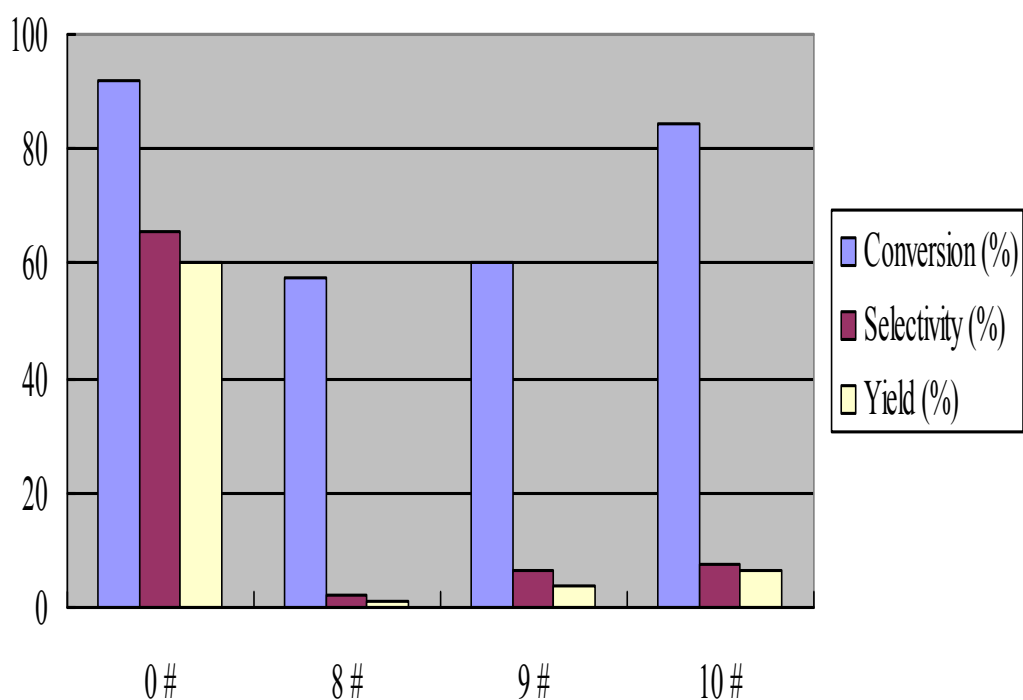

**Fig. S4.** Effect of various ion-exchanged resin on the production of 3-picoline under microwave irradiation. 0 #: Blank, 8 #: D 402 Na, 9 #: D 113 III, 10 #: D 001 H. (Reaction conditions: reaction temperature = 373 K, reaction time = 20 min, and mass ratio of glycerol/ammonium acetate/acetic acid/solid catalyst = 1/3/10/0.2).

**Figure S5**

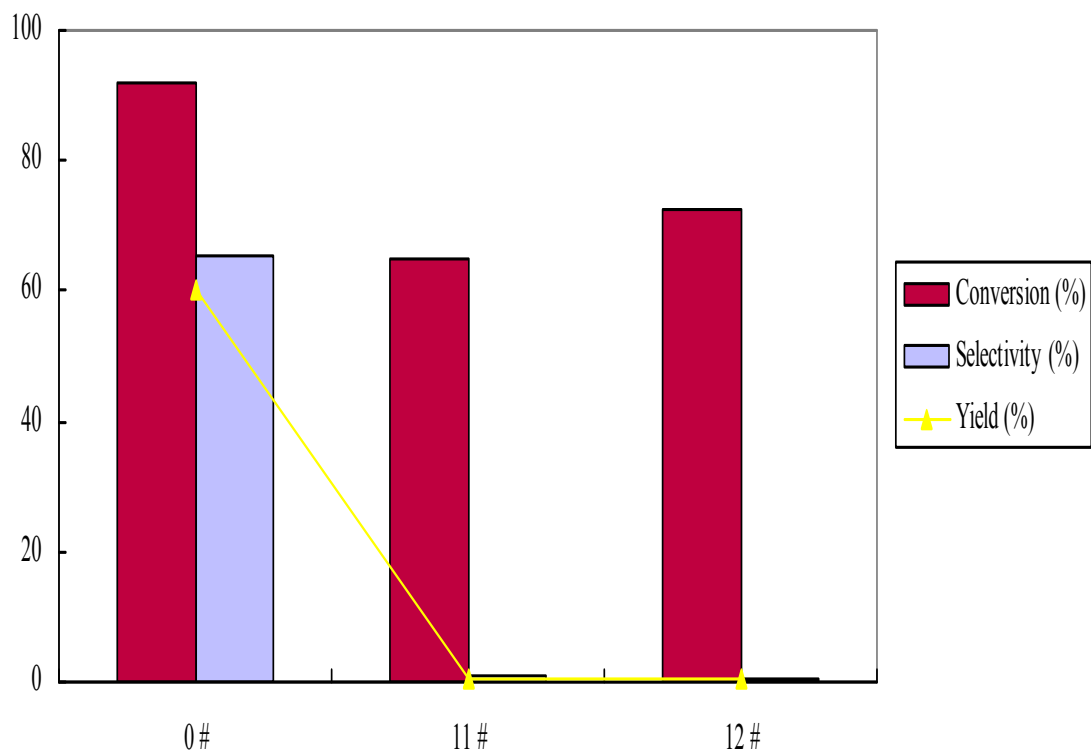

**Fig. S5.** Effect of KF and MgF<sub>2</sub> on the production of 3-picoline under microwave irradiation. 0 #: Blank, 11 #: KF, 12 #: MgF<sub>2</sub>. (Reaction conditions: reaction temperature = 373 K, reaction time = 20 min, and mass ratio of glycerol/ammonium acetate/acetic acid/solid catalyst = 1/3/10/0.2).

## Tables

**Table S1**

The textural and acid properties of various catalysts\*

| Catalysts | $S_{\text{BET}}$<br>(m <sup>2</sup> /g) | $S_{\text{micro}}$<br>(m <sup>2</sup> /g) | $S_{\text{ext}}$<br>(m <sup>2</sup> /g) | $T_{\text{m},i}$ <sup>a</sup> and $A_i$ <sup>b</sup> for various desorption peaks |                   |                          |                   |                                             |
|-----------|-----------------------------------------|-------------------------------------------|-----------------------------------------|-----------------------------------------------------------------------------------|-------------------|--------------------------|-------------------|---------------------------------------------|
|           |                                         |                                           |                                         | $T_{\text{m},1}$<br>(°C)                                                          | $A_1$<br>(mmol/g) | $T_{\text{m},2}$<br>(°C) | $A_2$<br>(mmol/g) | $A_{\text{total}}$ <sup>c</sup><br>(mmol/g) |
| HZSM-5    | 336                                     | 304                                       | 32                                      | 165                                                                               | 0.84              | 360                      | 1.03              | 1.87                                        |

\* $S_{\text{BET}}$ ,  $S_{\text{micro}}$  and  $S_{\text{ext}}$  refer to specific surface area, micropore surface area and external surface area, respectively, and  $S_{\text{BET}} = S_{\text{micro}} + S_{\text{ext}}$ .

<sup>a</sup>  $T_{\text{m},i}$  refers to the temperature at the maximum of desorption peak  $i$ ;

<sup>b</sup>  $A_i$  refers to the integral area of desorption peak  $i$  and it means also the concentration of acid site corresponding to desorption peak  $i$ ;

<sup>c</sup>  $A_{\text{total}} = \sum A_i$ .
